# Supplementary material for: Temporally degradable collagen–mimetic hydrogels tuned to chondrogenesis of human mesenchymal stem cells
Source: PubMed Central journal article supplement (PMC4910873; doi:10.1016/j.biomaterials.2016.05.011), 2016-08
Supplement: mmc1.pdf [file mmc1.pdf]

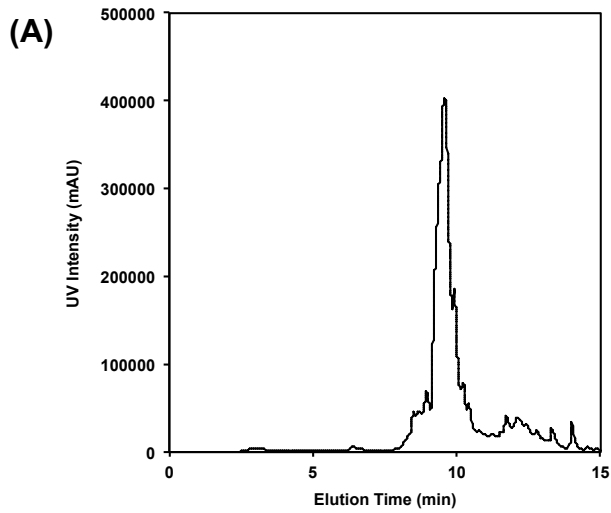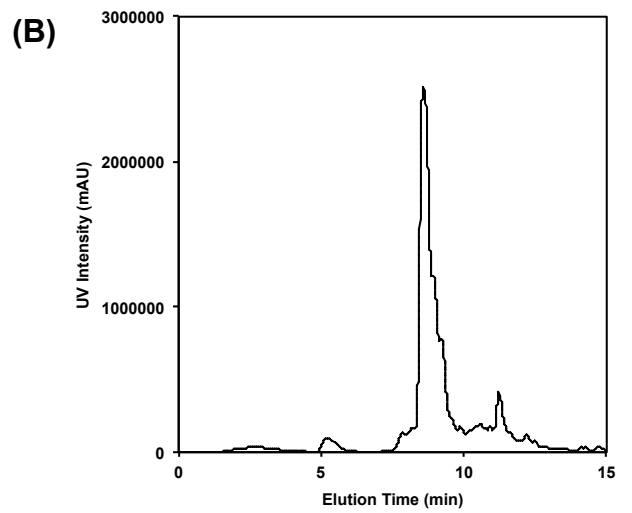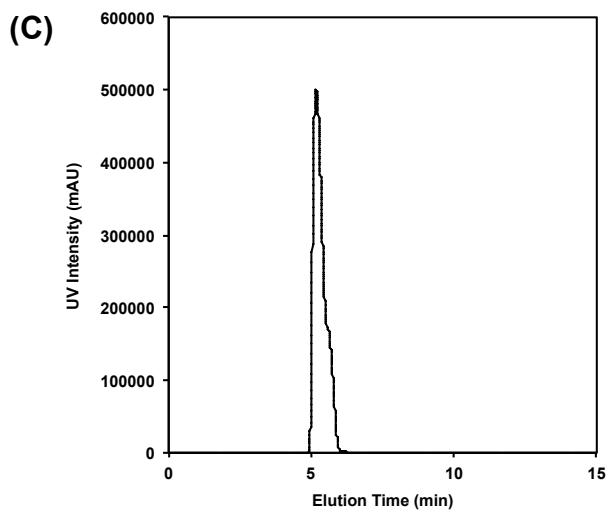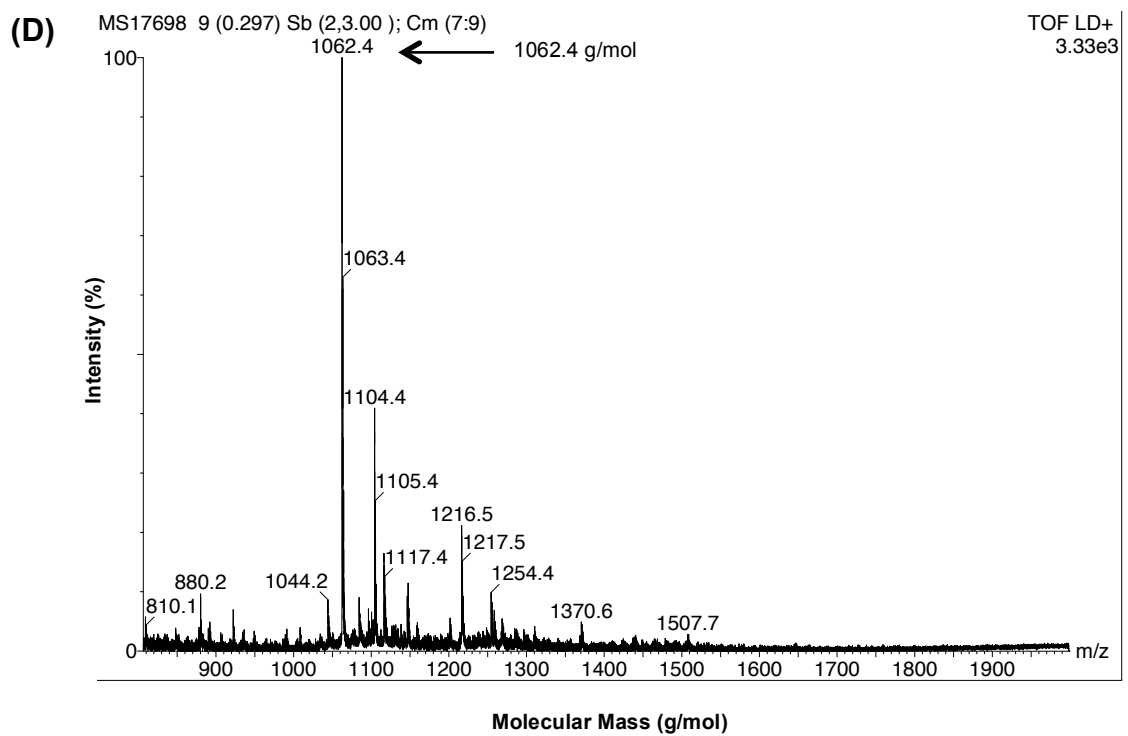

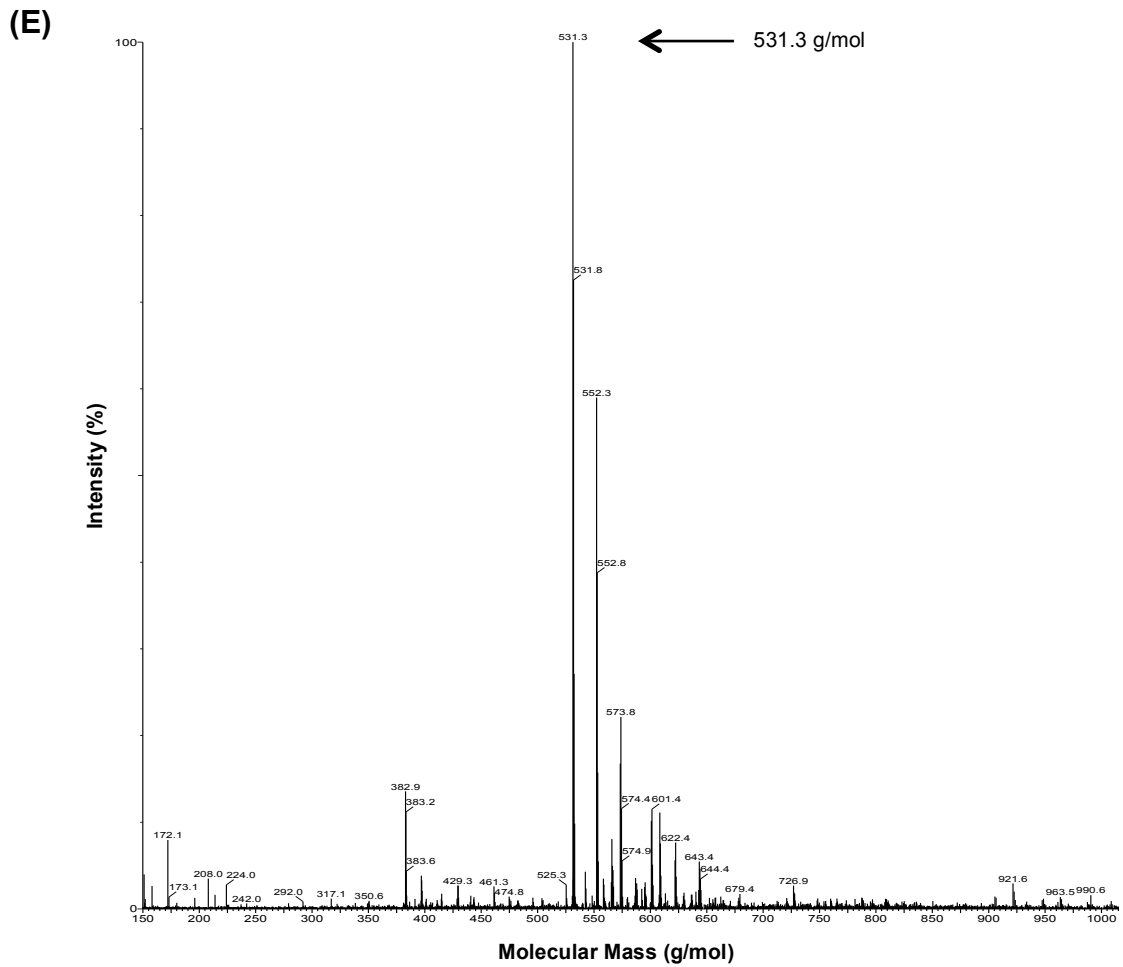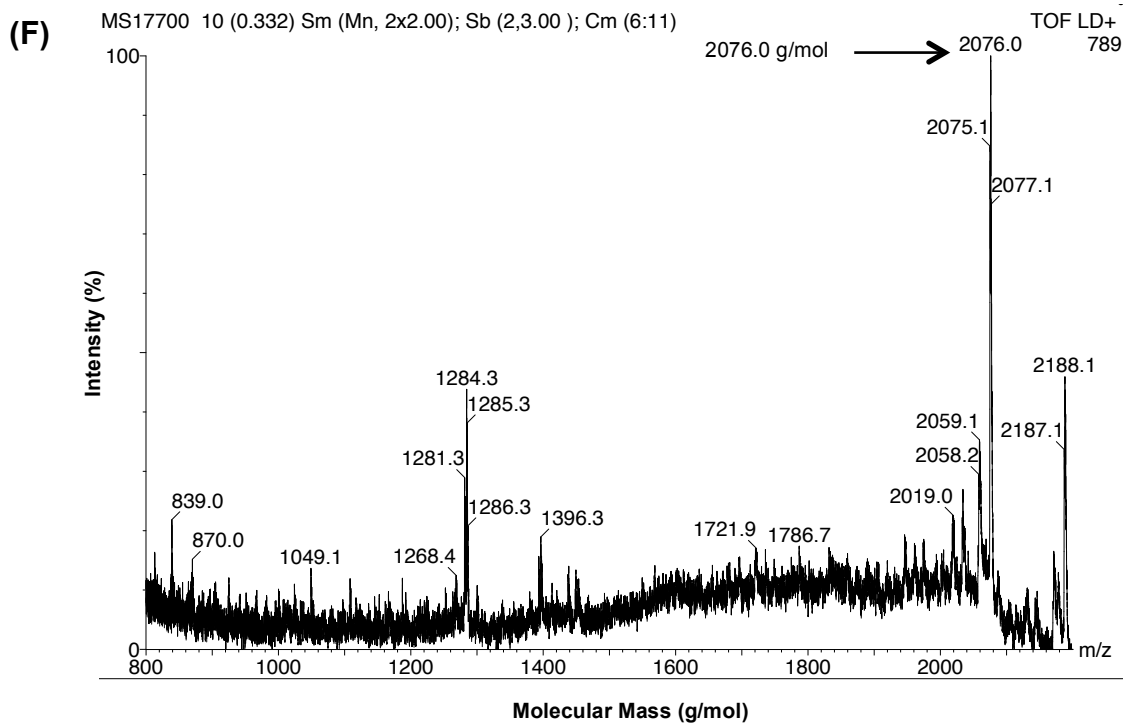

**Fig. S1.** Representative reverse phase HPLC chromatograms and MALDI/ESI spectra of (A, D) MMP7 (MW: 1062.4 g/mol), (B, E) ScrMMP7 (MW/2: 531.3 g/mol, MW: 1062.6 g/mol), and (C, F) ACAN (MW: 2076.0 g/mol) peptides, respectively.

(A)

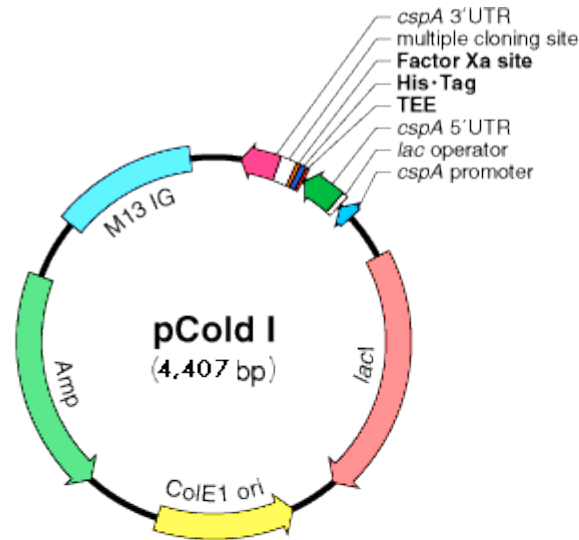

pCold I vector sequence:

```
1 AAGGAATGGT GTGGCCGATT AATCATAAAT ATGAAAAATA ATGTGTGCAT CACCCGCCAA TGCGTGGOTT AATGCACATC AAATTTGTGAG CGGATAACAA

      BmtI
      -+---+
      NheI
      +-----
101 TTGTATGTGC TAGCGCATAT CCAGTGTAGT AAGGCAAGTC CCTTCAAGAG TTATCGTTGA TACCCCTCGT AGTGCACATT CCTTTAACGC TTCAAAATCT
201 GTAAAGCAGC CCATATCGCC GAAAGGCACA CTTAATTATT AAGAGGTAAT ACACCATGAA TCACAAAGTG CATCATCATC ATCATCATAT CGAAGGTAGG

      AbsI
      +-----
      KpnI
      -+---+
      PspXI
      -+---+
      SacI
      -+---+
      Eco53kI
      -+---+
      XhoI
      -+---+
      EcoRI
      -+---+
      SalI
      -+---+
      AccI
      -+---+
      PstI
      -+---+
301 CATATGGAGC TCGGTACCC TCGAGGATCC GAATTC AAGC TTGTCGACCT GCAGCTCTAGA TAGGTAATCT CTGCTTAAAA GCACAGAATC TAAGATCCCT
401 GCCATTGGGC GGGGATTTTT TTATTTGTTT TCAGGAAATA AATAATCGAT CGCGTAATAA AATCTATTAT TATTTTTGTG AAGAATAAAT TTGGGTGCAA

      BsmI
      -+---+
      EcoO109I
      -+---+
      NspI
      -+---+
501 TGAGAATGCG CAGGCCCTTT CGTCTCGCGC GTTTCGGTGA TGACGGTGAA AACCTCTGAC ACATGCAGCT CCCGGAGACG GTCACAGCTT GTCGTGAAGC
601 GGATGCGGGG AGCAGACAAG CCCGTCAGGG CGCGTCAAGC GGTGTGGCGG GGTGTGGGGG CTGGCTTAAC TATGCGGCAT CAGAGCAGAT TGTACTGAGA
701 GTGCACCATA AAATTTGAAA CGTTAATATT TTGTTAAAA TCAGCTTAAA TTTTGTGTTA ATCAGCTCAT TTTTAAACCA ATAGGCCGAA ATCGGCAAAA

      PsiI
      -+---+
801 TCCCTTATAA ATCAAAAGAA TAGCCCGAGA TAGGGTTGAG TGTGTGTTCA GTTTGGAACA AGAGTCCACT ATTAAGAAGC GTGACTCCA ACGTCAAAGG

      BsaAI
      -+---+
901 GCGAAAAACC GTCTATCAGG GCGATGGCCC ACTACGTGAA CCATCACCCA AATCAAGTTT TTTGGGGTGC AGGTGCCGTA AAGCACTAAA TCGGAACCCT

      NaeI
      -+---+
      NgoMIV
      -+---+
1001 AAAGGGAGCC CCCGATTAG AGCTTGACGG GGAAGCCGGG CGAACGTGGC GAGAAAGGAA GGAAGAAAG CGAAAGGAGC GGGCGCTAGG CCGCTGGCAA
1101 GTGTAGCGGT CACGTGCGC GTAACCACCA CACCCGCCGC GCITTAATGCG CCGCTACAGS CCGCGTACTA TGGTTGCITT GACGTATGCG GTGTGAAATA
1201 CCGCACAGAT GCGTAAGGAG AAAATACCGC ATCAGGCCTC AGGTGGCACT TTTCCGGGAA ATGTGCGCGG AACCCCTATT TGTTTATTTT TCTAAATACA
1301 TTCAAATATG TATCCGCTCA TGAGACAATA ACCCTGATAA ATGCTTCAAT AATATTGAAA AAGGAAGAGT ATGAGTATTC AACATTTCCG TGTCGCCCTT
1401 ATTCCTTTT TTGCGGCATT TTGCTTCTCT GTTTTTGCTC ACCCAGAAAC GCTGGTGAAA GTAAAAGATG CTGAAGATCA GTTGGGTGCA CGAGTGGGTT

      XmnI
      -+---+
1501 ACATCGAACT GGATCTCAAC AGCGGTAAGA TCCTTGAGAG TTTTCGCCCC GAAGAACGTT TTCCAATGAT GAGCACTTTT AAAGTTCTGC TATGTGGCGC

      ScaI
      -+---+
1601 GGTATTATCC CGTATTGACG CCGGGCAAGA GCAACTCGGT CGCCGCATAC ACTATTCTCA GAATGACTTG GTTGTGTTCT CACCAGTCTC AGAAAAGCAT
1701 CTTACGGATG GCATGACAGT AAGAGAATTA TGCAGTGTCT CCATAACCAT GAGTGATAAC ACTGCGGCCA ACTTACTTCT GACAACGATC GGAGGACCGA
1801 AGGAGCTAAC CGCTTTTTTG CACAACATGG GGGATCATGT AACTCGCCTT GATCGTTGGG AACCGGAGCT GAATGAAGCC ATACCAAACG ACGAGCGTGA
1901 CACCACGATG CCGTAGCAA TGGCAACAAC GTTGCACAAA CTATTAACGT GCGAAGTACT TACTCTAGCT TCCCGGCAAC AATTAATAGA CTGGATGGAG
```

```

                BglI
                -----
2001  GCGGATAAAG TTGCAGGACC ACTTCTGCGC TCGGCCCTTC CGGCTGGCTG GTTATTGCT GATAAATCTG GAGCCGGTGA GCGTGGGTCT CGCGGTATCA
2101  TTGCAGCACT GGGGCCAGAT GGTAAAGCCCT CCCGTATCGT AGTTATCTAC ACGACGGGGA GTCAGGCAAC TATGGATGAA CGAAATAGAC AGATCGCTGA
2201  GATAGTGICC TCACTGATTA AGCATTGGTA ACTGTCAGAC CAAGTTTACT CATATATACT TTAGATTGAT TAAAACTTC ATTTTAATT TAAAAGGATC
2301  TAGGTGAAGA TCCTTTTTGA TAATCTCATG ACCAAAAATC CTTAACGTGA GTTTTCGTTT CACTGAGCGT CAGACCCCGT AGAAAAAGATC AAAGGATCTT
2401  CTGAGATCC TTTTTTCTG CGCGTAATCT GCTGCTTGCA AACAAAAAAA CCACCGCTAC CAGCGGTGGT TTGTTGCCG GATCAAGAGC TACCAACTCT
2501  TTTCCGAAG GTAACITGGCT TCAGCAGAGC GCAGATACCA AATACTGTTC TTCTAGTGA GCCGTAGTA GGCCACCACT TCAAGAACTC TGTAGCACCG

                AlwNI
                -----+---
2601  CCTACATACC TCGCTCTGCT AATCCTGTTA CCAGTGGCTG CTGCCAGTGG CGATAAGTGG TGTCTTACCG GTTTGGACTC AAGACGATAG TTACCGGATA
2701  AGGCGCAGCG GTCGGGCTGA ACGGGGGGTT CGTGACACACA GCCCAGCTTG GAGCGAACGA CCTACACCGA ACTGAGATAC CTACAGCGTG AGCTATGAGA
2801  AAGGCCACG CTTCCCGAAG GGAGAAAGGC GGACAGGTAT CCGGTAAGCG GCAGGTCGG AACAGGAGAG CGCACGAGGG AGCTTCCAGG GGGAAACGCC
2901  TGGTATCTTT ATAGTCTCTG CGGGTTTCGC CACCTCTGAC TTGAGCGTCG ATTTTTGTA TGCTCGTCAG GGGGGCGGAG CCTATGGAAA AACGCCAGCA
3001  ACGCGGCCCT TTTACGGTTC CTGGCCTTTT GCTGGCCTTT TGCTCACATA GTCATGCCCC GCGCCACCAG GAAGGAGCTG ACTGGGTTGA AGGCTCTCAA
3101  GGGCATCGGT CGAGATCCCG GTGCCTAATG AGTGAGCTAA CTTACATTA TTGCGTTGCG CTCACTGCCC GCITTCAGT CGGAAAACCT GTCGTGCCAG

                BbeI
                -----+
                SfoI
                -----+
                NarI
                -----
                KasI
                -+-----
3201  CTGCATTAAT GAATCGGCCA ACGCGCGGGG AGAGGCGGTT TCGTATTGG GCGCCAGGGT GGTTTTTCTT TTCACCAGTG AGACGGGCAA CAGCTGATTG

                HpaI
                ---+---
3301  CCCTTCACCG CCTGGCCCTG AGAGAGTTGC AGCAAGCGGT CCACGCTGGT TTGCCCCAGC AGGCGAAAAT CCTGTTTGT GGTGGTTAAC GGGGGGATAT

                EcoRV
                -----+
                BssHII
                -+-----
3401  AACATGAGCT GTCTTCGGTA TCGTCGTATC CCACTACCGA GATATCCGCA CCAACGCGCA GCCCGGACTC GGTAATGGCG CGCATTGGCG CCAGCGCCAT
3501  CTGATCGTTG GCAACCAGCA TCGCAGTGGG AACGATGCCC TCATTACGCA TTTGCATGGT TTGTTGAAAA CCGGACATGG CACTCCAGTC GCCTTCCCGT

                ApaI
                -----+
                PspOMI
                -+-----
3601  TCCGCTATCG GCTGAATTTG ATTGCGAGTG AGATAATTTAT GCCAGCCAGC CAGACGAGA GCGCGCGAGA CAGAACTTAA TGGGCCCGCT AACAGCGCGA

                BstEII
                -+-----
3701  TTTGCTGGTG ACCCAATGCG ACCAGATGCT CCACGCCAG TCGCGTACCG TCTTCATGGG AGAAAATAAT ACTGTTGATG GGTGCTGTGT CAGAGACATC

                BclI
                -+-----
                AflIII
                -+-----
                MluI
                -+-----
3801  AAGAAATAAC GCCGGAACAT TAGTGCAGGC AGCTTCCACA GCAATGGCAT CCTGTGATC CAGCGGATAG TTAATGATCA GCCCACTGAC GCGTTGCGCG
3901  AGAAGATTGT GCACCCCGCG TTTACAGGCT TCGACGCCG TTCGTTCTAC CATCGACACC ACCACGCTGG CACCCAGTTG ATCGGCGCGA GATTTAATCG
4001  CCGCGACAAT TTGCGACGGC GCGTGCAGGG CCAGACTGGA GGTGGCAACG CCAATCAGCA ACGACTGTTT GCCCGCCAGT TGTGTGCCA CCGCGTTGGG
4101  AATGTAATTC AGCTCCGCCA TCGCCGCTTC CACTTTTTCC CGGTTTTTCG CAGAAACGTG GCTGGCCTGG TTCACCACGC GGGAAACGCT CTGATAAGAG

                BstAPI
                -----+
4201  ACACCGGCAT ACTCTGCGAC ATCGTATAAC GTTACTGGTT TCACATTAC CACCTGAAAT TGACTCTCTT CCGGGCGCTA TCATGCCATA CCGCGAAAGG

                EcoNI
                -----+
4301  TTTTGCCCA TTCGATGGTG TCCGGGATCT CGACGCTCTC CCTTATGCGA CTCCTGCATT AGGAAGCAGC CCAGTAGTAG GTTGGGCCG TTGAGCACCG
4401  CCGCCGC

```

**(B)**

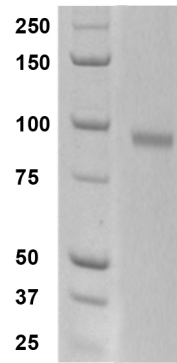

**Fig. S2.** (A) A fully annotated plasmid map of the pColdI vector system used to sub-clone the final DNA sequence for expression in *E. coli*. (B) A representative SDS-PAGE gel of the HIHA-ScI2 protein.

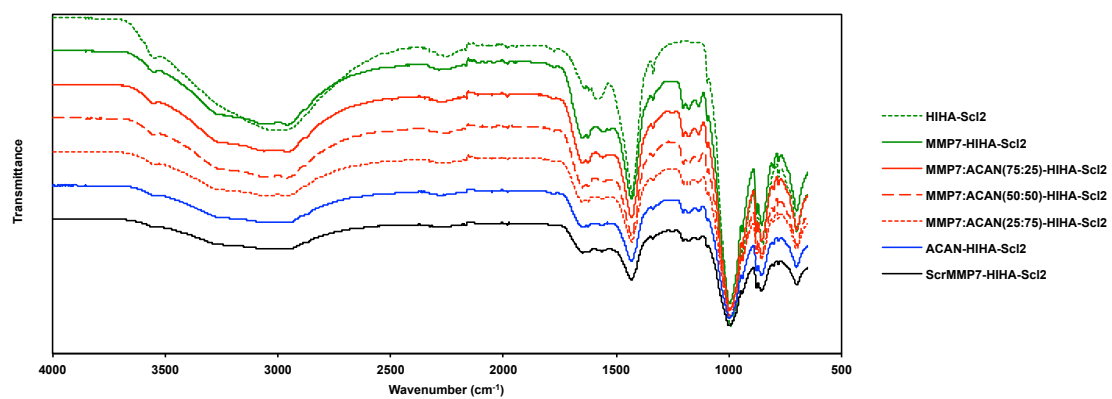

**Fig. S3.** Representative FTIR spectra of functionalized Scl2 proteins confirming the conjugation of Scl2 with acrylate-functionalized MMP7 and ACAN peptides.

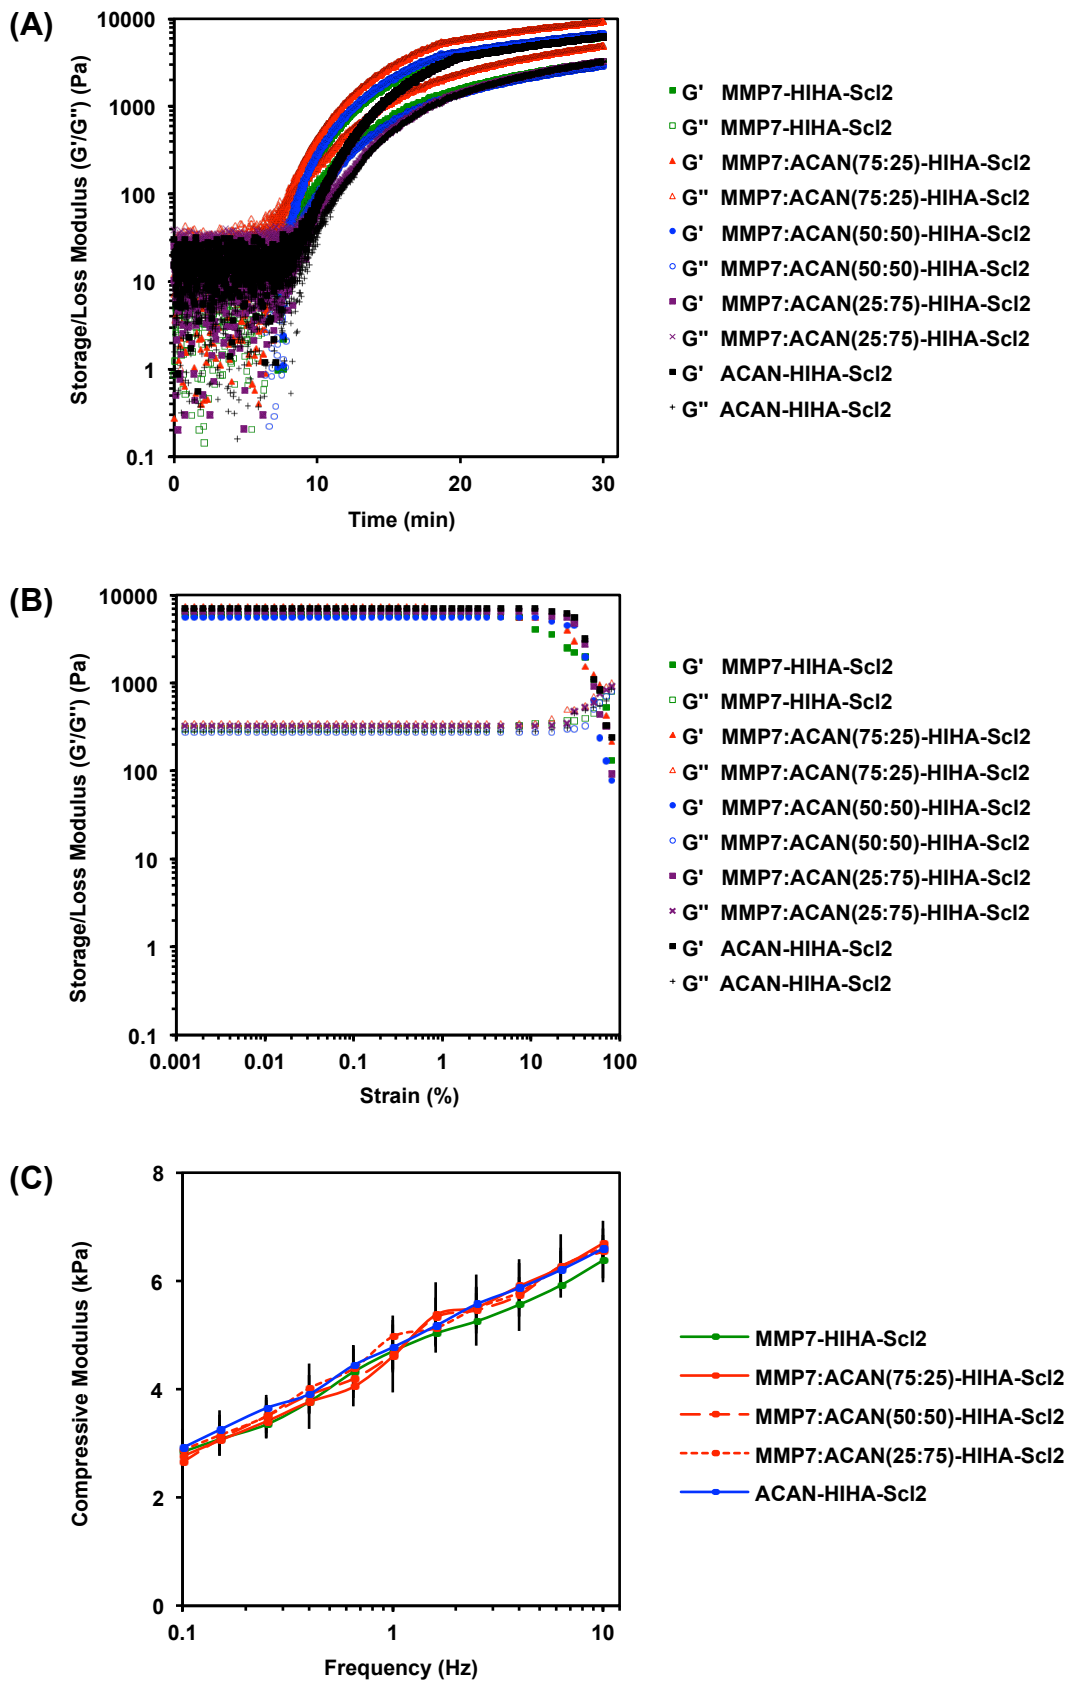

**Fig. S4.** Rheological properties of acellular functionalized Scl2 hydrogels. (A) Time to gelation determined at a temperature of 37 °C, angular frequency of 6.28 rad/s, and strain of 0.5% shown as  $G'$  and  $G''$ . (B) Strain sweep at a temperature of 37 °C and an angular frequency of 6.28 rad/s shown as  $G'$  and  $G''$ . (C) Dynamic mechanical analysis (DMA) used to determine the elastic modulus in unconfined compression of hydrogels compressed to 10% strain at 0.5% strain/min from 0.1 to 10 Hz. Values represent means  $\pm$  SD (n = 3).

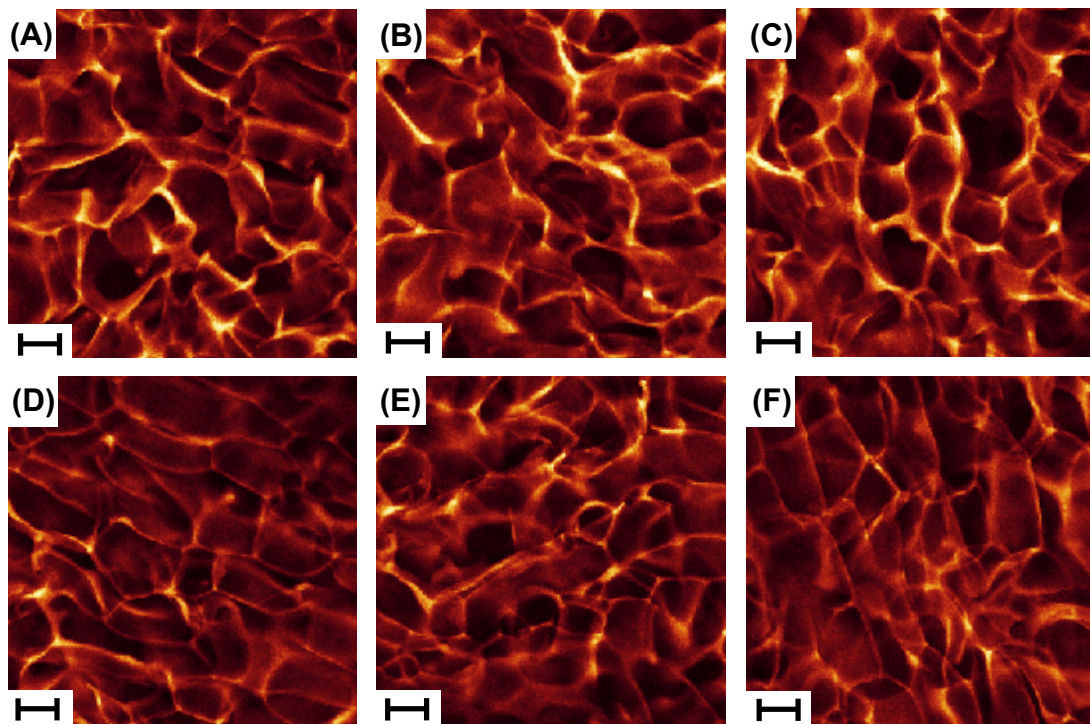

**Fig. S5.** Representative multi-photon second harmonic generation (MP-SHG) images of acellular (A) ScrMMP7-HIHA-ScI2, (B) MMP7-HIHA-ScI2, (C) MMP7:ACAN(75:25)-HIHA-ScI2, (D) MMP7:ACAN(50:50)-HIHA-ScI2, (E) MMP7:ACAN(25:75)-HIHA-ScI2, and (F) ACAN-HIHA-ScI2 hydrogels (scale bars are 10  $\mu\text{m}$ ).



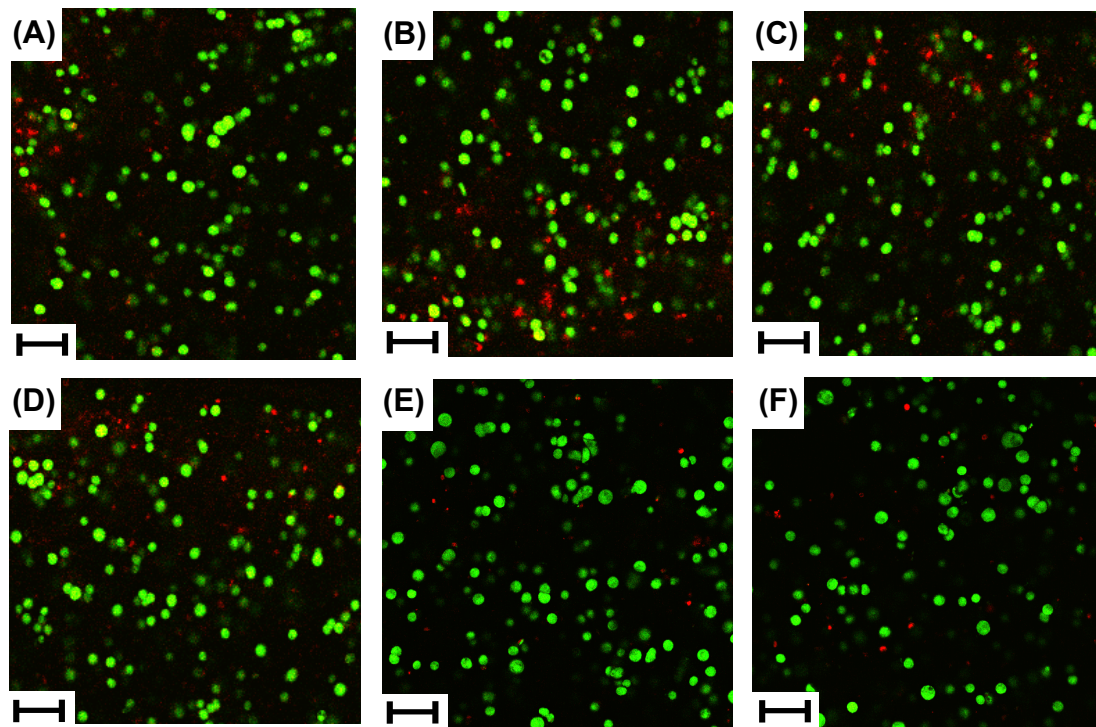

**Fig. S6.** hMSC viability in ScI2 hydrogels. LIVE/DEAD<sup>®</sup> Viability/Cytotoxicity assay on hMSCs cultured for 6 weeks in hydrogels. Representative confocal images of cells in (A) ScrMMP7-HIHA-ScI2, (B) MMP7-HIHA-ScI2, (C) MMP7:ACAN(75:25)-HIHA-ScI2, (D) MMP7:ACAN(50:50)-HIHA-ScI2, (E) MMP7:ACAN(25:75)-HIHA-ScI2, and (F) ACAN-HIHA-ScI2 hydrogels (scale bars are 50 μm).

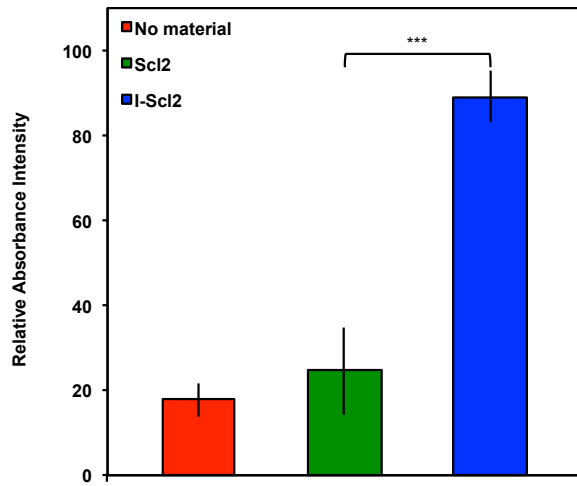

**Fig. S7.** Integrin ( $\alpha 1\beta 1$  and  $\alpha 2\beta 1$ ) binding of hMSCs on Sc12 proteins. Empty wells were used as a negative control denoted 'no material'. Values represent means  $\pm$  SD. \*\*\* $p < 0.001$  ( $n = 3$  for each donor; 3 different bone marrow-derived hMSC donors).

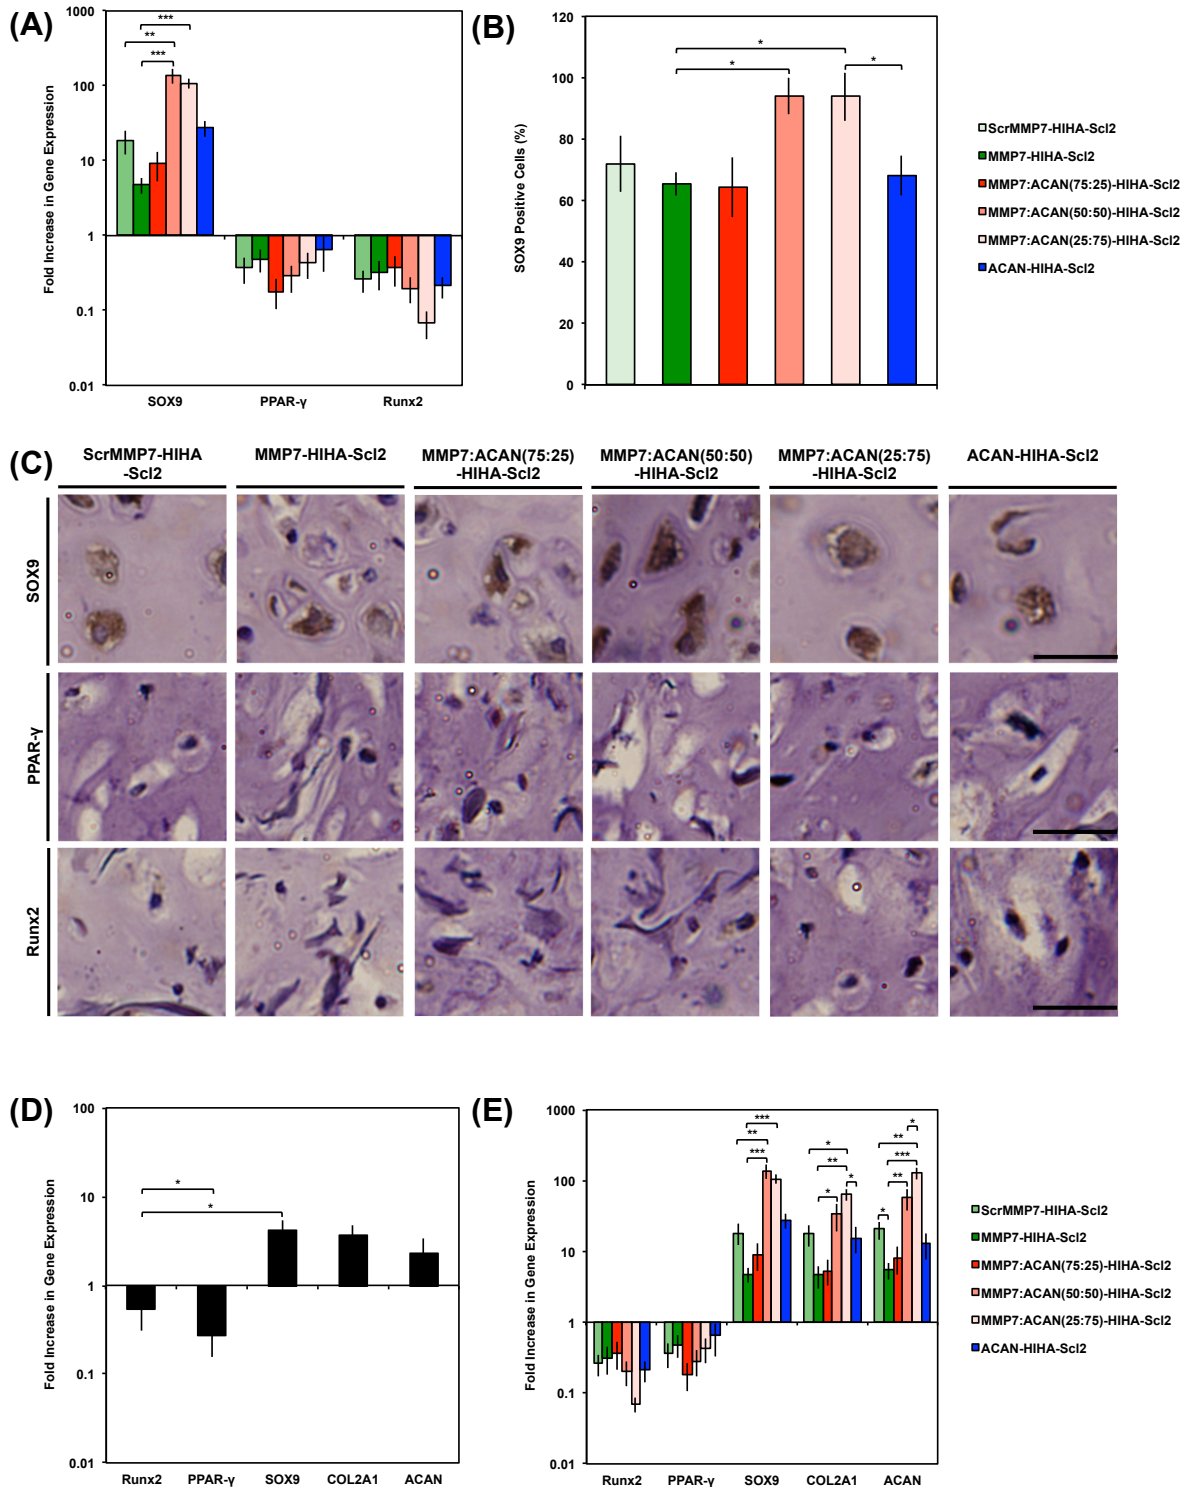

**Fig. S8.** (A) hMSC gene expression in Scl2 hydrogels. SOX9, Runx2, and PPAR- $\gamma$  gene expression of hMSCs encapsulated in hydrogels after 2 weeks in culture, as analyzed using the  $\Delta\Delta$ Ct method. Data presented as a fold difference relative to undifferentiated hMSCs (calibrator) prior to encapsulation and normalized to GAPDH (housekeeping gene). (B) Percentage positive SOX9 cells determined from immunohistochemical stained sections for SOX9 and normalized to total number of cells. (C) High magnification images showing representative immunohistochemical examination of hMSC-seeded hydrogels after 14 days in culture. Hydrogels are stained for SOX9, PPAR- $\gamma$ , and Runx2, respectively, from top to bottom. Scale bars are 100  $\mu$ m. (D) hMSC gene expression in pellet cultures. Runx2, PPAR- $\gamma$ , SOX9, COL2A1, and ACAN gene expression of hMSCs after 2 weeks in culture, as analyzed using the  $\Delta\Delta$ Ct method. Data presented as a fold difference relative to undifferentiated hMSCs (calibrator) and normalized to GAPDH (housekeeping gene). (E) hMSC gene expression in Scl2 hydrogels. Runx2, PPAR- $\gamma$ , SOX9, COL2A1, and ACAN gene expression of hMSCs encapsulated in hydrogels after 2 weeks in culture, as analyzed using the  $\Delta\Delta$ Ct method. Data presented as a fold difference relative to undifferentiated hMSCs (calibrator) prior to encapsulation and normalized to GAPDH (housekeeping gene). The data in Fig. S8 is reproduced from Fig. 6. Values represent means  $\pm$  SD. \*\* $p$  < 0.01, \*\*\* $p$  < 0.001 ( $n$  = 3 for each donor; 3 different bone marrow-derived hMSC donors).

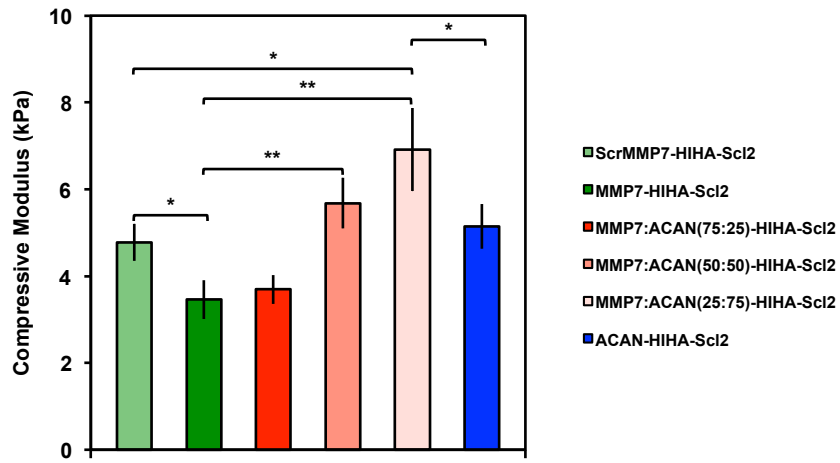

Fig. S9. Dynamic mechanical analysis (DMA). Elastic compression moduli of cell-seeded Scl2 hydrogels compressed to 10% strain at 0.5% strain/min and 1 Hz after 6 weeks of culture. Values represent means  $\pm$  SD. (n = 3 for each donor; 3 different bone marrow-derived hMSC donors).

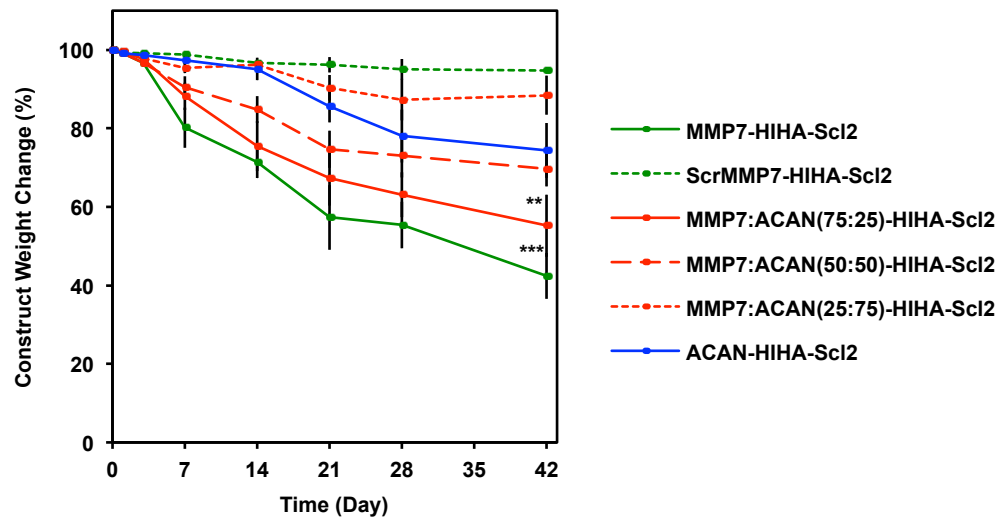

**Fig. S10.** Scl2 hydrogel dry weight change over time in culture with hMSCs. Weight change was normalized to dry weight at day 0. Values represent means  $\pm$  SD. \*\* $p < 0.01$  versus MMP7:ACAN(25:75)-HIHA-Scl2, \*\*\* $p < 0.001$  versus MMP7:ACAN(25:75)-HIHA-Scl2 (n = 3 for each donor; 3 different bone marrow-derived hMSC donors).

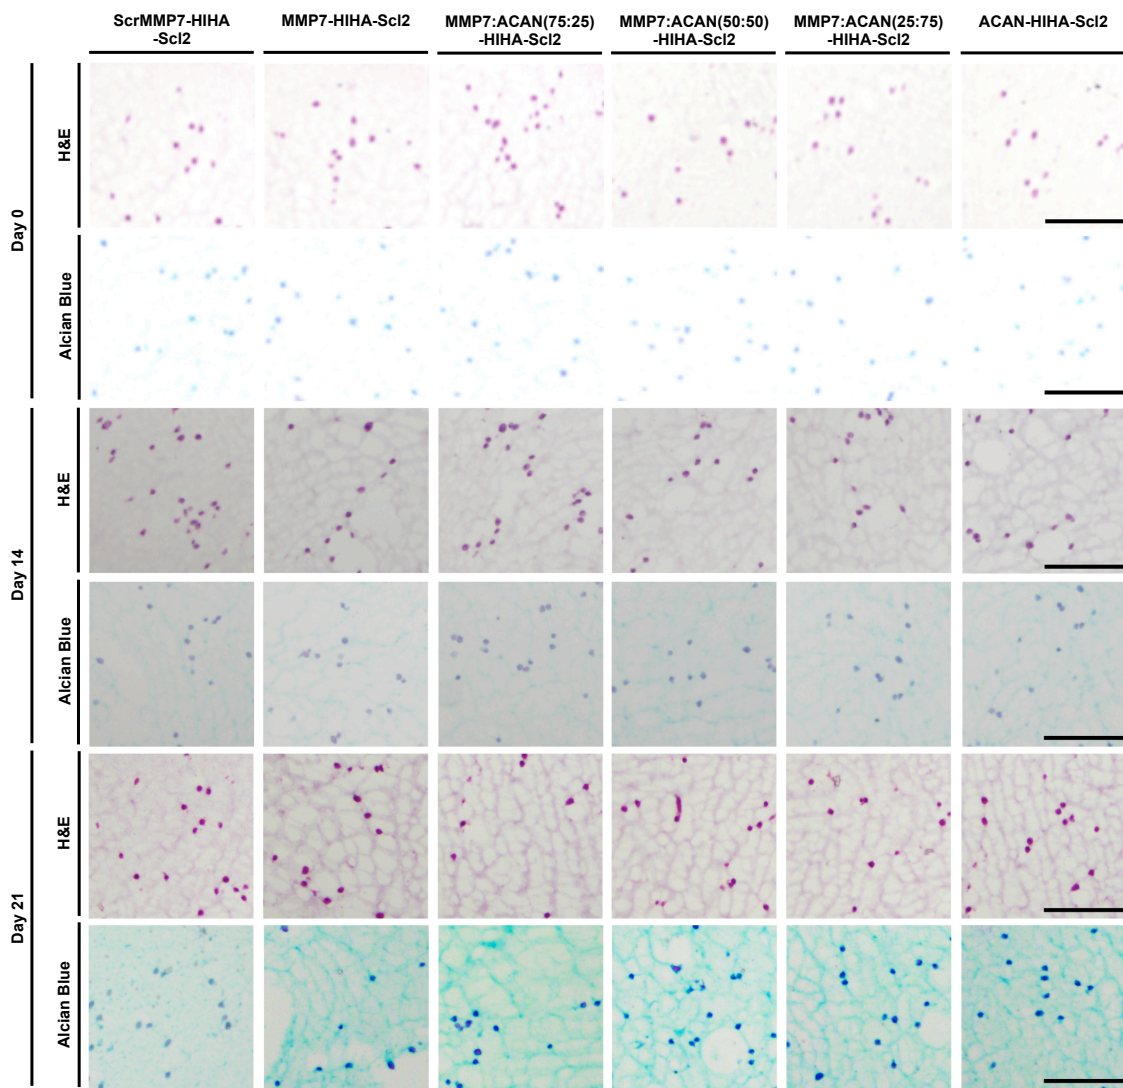

**Fig. S11.** ECM accumulation of hMSC-seeded ScI2 hydrogels. Representative histological examination of hMSC-seeded hydrogels after 0, 14, and 21 days in culture. Hydrogels are stained with haematoxylin and eosin (H&E) and alcian blue for sGAG. Scale bars are 50  $\mu$ m.

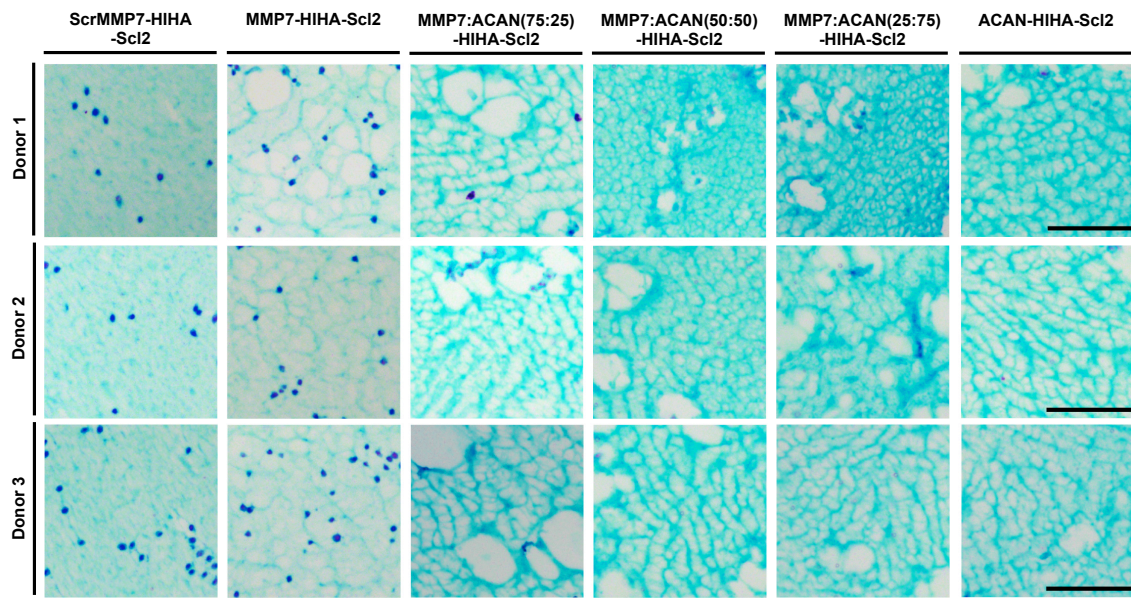

**Fig. S12.** ECM accumulation of hMSC-seeded ScI2 hydrogels from three different donors. Representative histological examination of hMSC-seeded hydrogels after 42 days in culture. Donor 1 images are reproduced from Fig. 7. Hydrogels are stained with alcian blue for sGAG. Scale bars are 50  $\mu$ m.

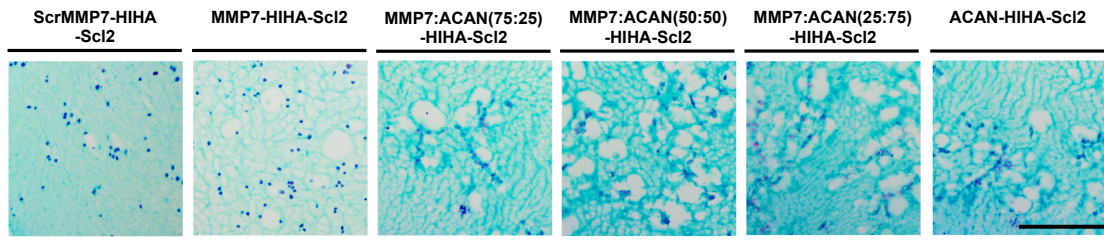

**Fig. S13.** Low magnification images demonstrating ECM accumulation of hMSC-seeded Scl2 hydrogels. Representative histological examination of hMSC-seeded hydrogels after 6 weeks in culture. Hydrogels are stained with alcian blue for sGAG. Scale bars are 200  $\mu$ m.



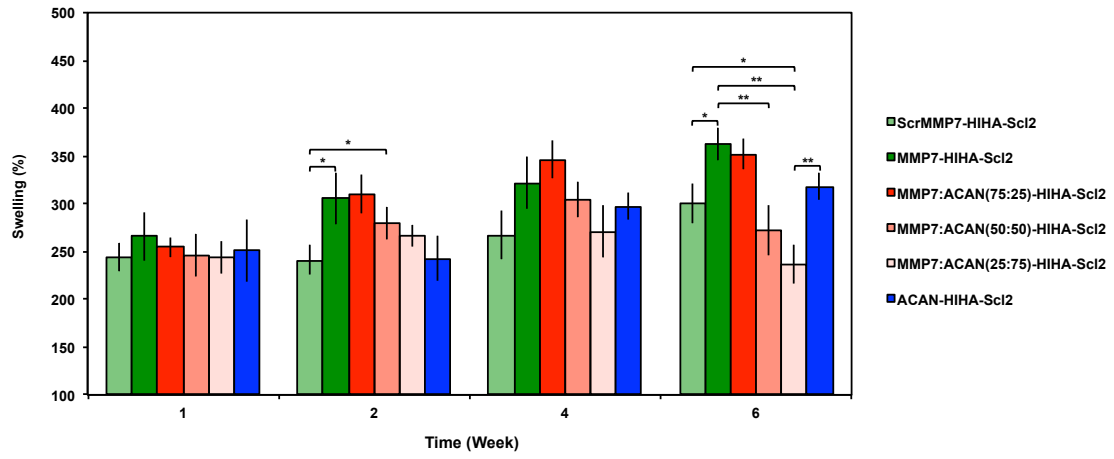

**Fig. S14.** Swelling behavior of cell-seeded Scl2 hydrogels over time. Values represent means  $\pm$  SD. \* $p < 0.05$ , \*\* $p < 0.01$  ( $n = 3$  for each donor; 3 different bone marrow-derived hMSC donors).
